# Supplementary material
Source: bioRxiv or medRxiv preprint supplement (https://www.biorxiv.org/highwire/filestream/95491/field_highwire_adjunct_files/0/311076-1.pdf)
Supplement: Supplementary file [file 311076-1.pdf]

# Supplementary Material: To B or not to B: *Arsenophonus* as a source of B-vitamins in whiteflies.

## 1 SUPPLEMENTARY FIGURES

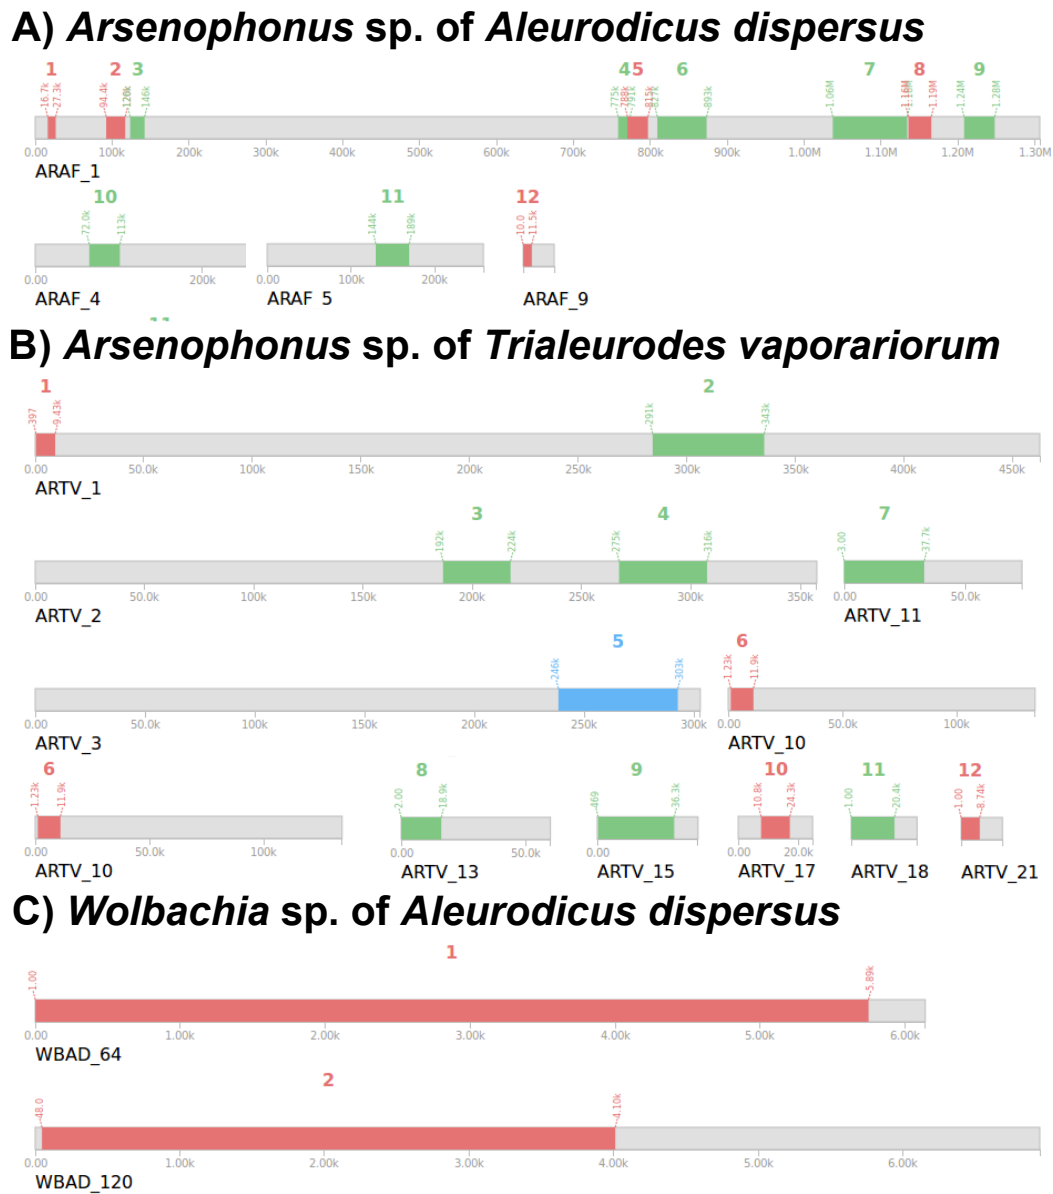

**Figure S1.** Prophages regions detected in *Arsenophonus* (A) ARAF, (B) ARTV and (C) *Wolbachia* WBAD. Red bars represents incomplete prophages, green bars complete prophages and blue bars questionable complete prophages.

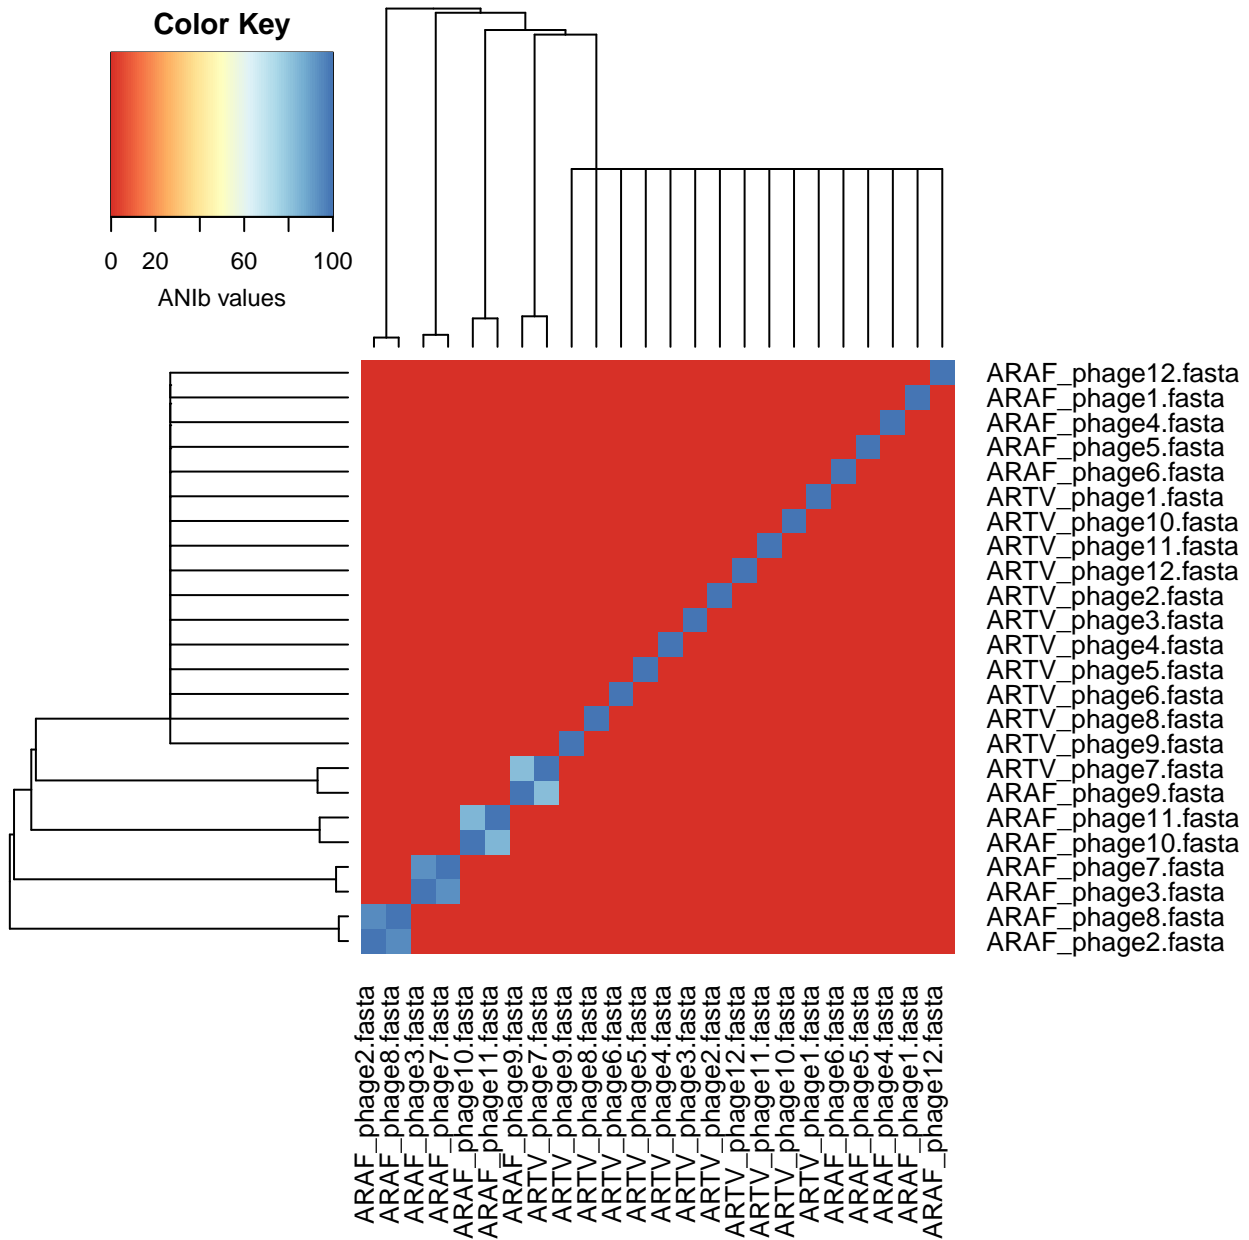

**Figure S2.** Hierarchical clustering of pairwise Average Nucleotide Identity (ANI) between the *Arsenophonus* ARAF and ARTV detected phages.

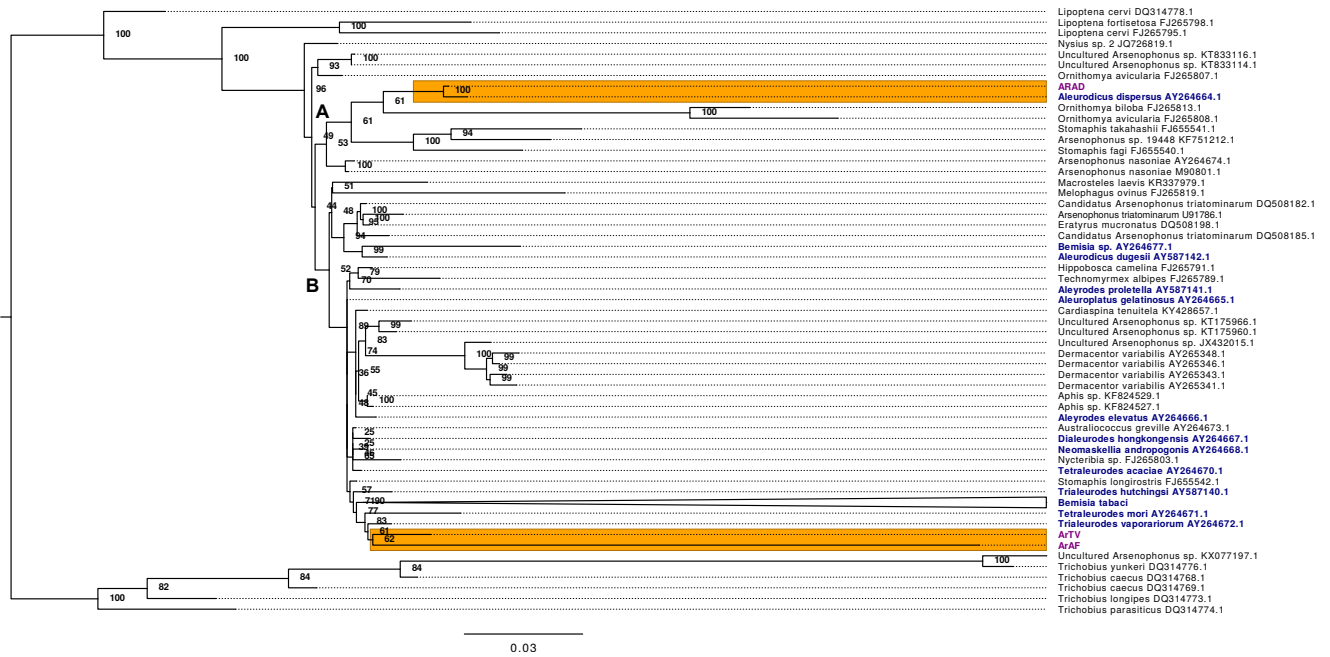

**Figure S3.** Midpoint rooted maximum likelihood tree obtained for several *16S rRNA* genes from *Arsenophonus* infecting different hosts. The tree was inferred using a TVM+F+R3 substitution model and 1000 ultrafast bootstraps (node labels). *Arsenophonus* from *Aleurodicus dispersus* (ARAD), *A. floccissimus* (ARAF) and *Trialeurodes vaporariorum* (ARTV) are highlighted in purple. *Arsenophonus* from different whiteflies are highlighted in blue. Two potential clades are denoted with letters A and B

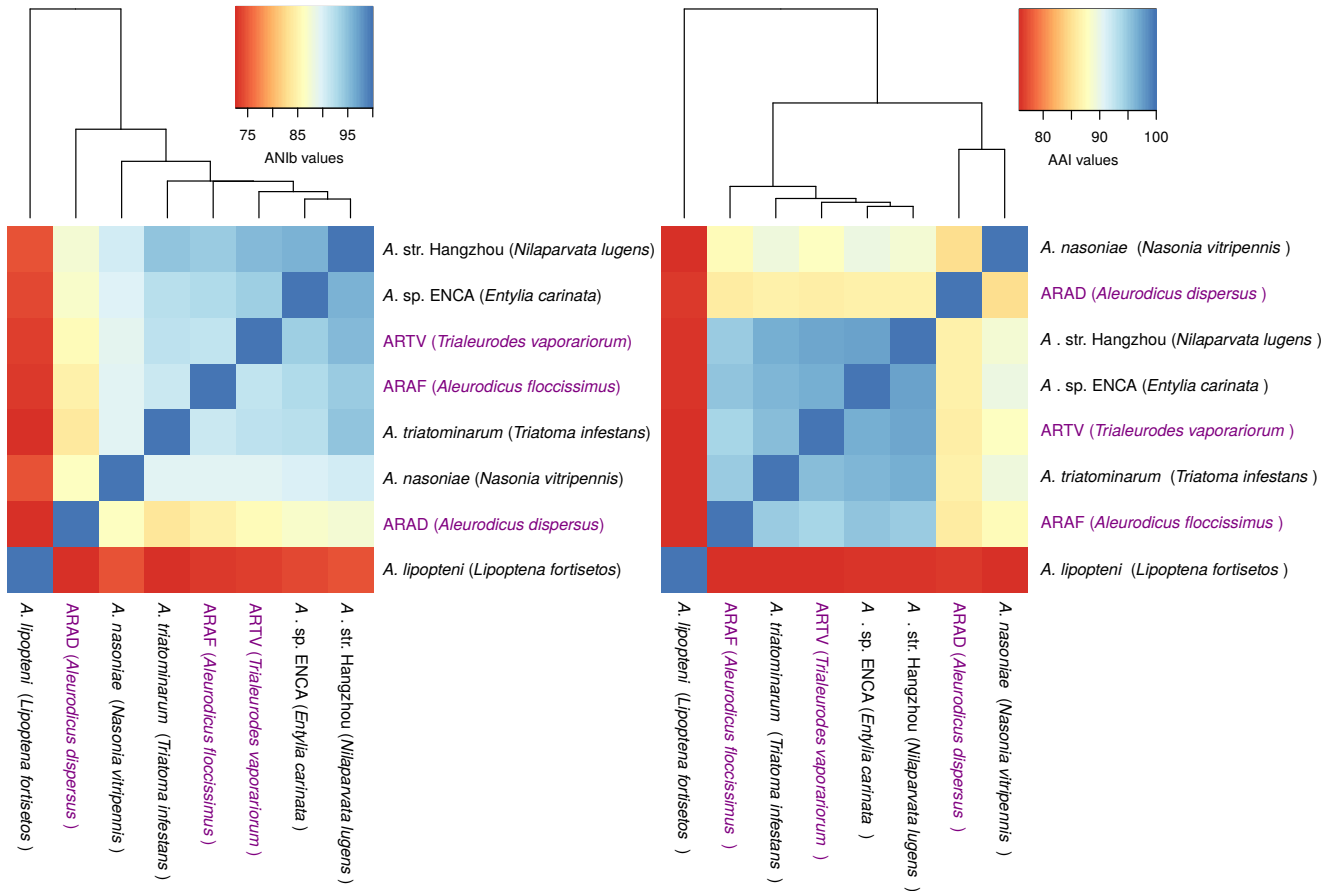

**Figure S4.** Hierarchical clustering of pairwise Average Nucleotide Identity (ANI, left) and Average Amino Acid Identity (AAI, right) of several *Arsenophonus* genomes. *Arsenophonus* from *Aleurodicus dispersus* (ARAD), *A. floccissimus* (ARAF) and *Trialeurodes vaporariorum* (ARTV) are highlighted in purple. Names for the eukaryotic hosts are shown after the strain names inside parentheses.

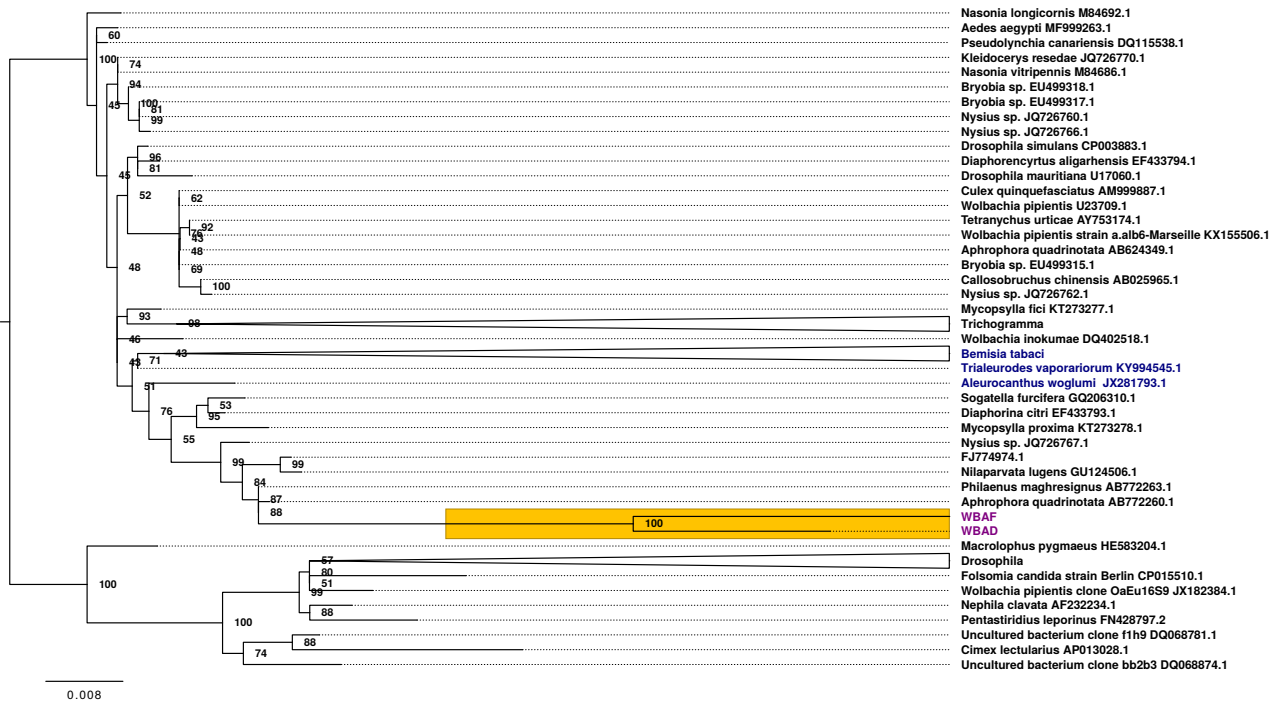

**Figure S5.** Midpoint rooted maximum likelihood tree obtained for several *16S rRNA* genes from *Wolbachia* infecting different hosts. The tree was inferred using a TN+F+R2 substitution model and 1000 ultrafast bootstraps (node labels). *Wolbachia* from *Aleurodicus dispersus* (WBAD) and *A. floccissicums* (WBAF) are highlighted in purple. *Wolbachia* from different whiteflies are highlighted in blue.
